# Supplementary material for: Guest induced reversible on–off switching of elastic frustration in a 3D spin crossover coordination polymer with room temperature hysteretic behaviour
Source: PubMed Central journal article supplement — Chem Sci. 2020 Nov 23;12(4):1317–26. doi: 10.1039/d0sc04420b (PMC8179064; doi:10.1039/d0sc04420b), 2020-11-23

## Supporting Information

### Guest Induced Reversible ON-OFF Switching of Elastic Frustration in a 3D Spin Crossover Coordination Polymer with Room Temperature Hysteretic Behaviour

L. Piñeiro-López, F.-J. Valverde-Muñoz, E. Trzop, M. C. Muñoz, M. Seredyuk, J. Castells-Gil, I. da Silva, Carlos Martí-Gastaldo, E. Collet, J. A. Real.

**Figure S1.** IR spectrum of **1·PhNO<sub>2</sub>** and **1** in the wave-length window 2000-1200 cm<sup>-1</sup> emphasising the evolution of the characteristic asymmetric and symmetric stretching modes when moving from **1·PhNO<sub>2</sub>** to **1** (vertical red lines indicate the position of both modes). Page 2.

**Figure S2.** Thermogravimetric analysis of **1·PhNO<sub>2</sub>**. Page 2.

**Figure S3.** Thermal dependence of  $\chi_{MT}$  for **1·PhNO<sub>2</sub>** before desorption of PhNO<sub>2</sub> (left) and after re-adsorption of PhNO<sub>2</sub> (right) from the desorbed compound **1** (middle). Blue and red dots correspond to the cooling and heating modes, respectively. Page 3.

**Figure S4.** Magnetic properties of **1·PhNO<sub>2</sub>** emphasising the photo-generation of the metastable HS\* states at low temperatures (LIESST effect). Page 3.

**Figure S5.** Comparison of  $\chi_{MT}$  vs T and  $\Delta H$  vs T plots and derivative of the  $\Delta H$  vs T plot for **1·PhNO<sub>2</sub>**. Page 4

**Figure S6.** Cell parameters change with temperature and light for **1·PhNO<sub>2</sub>**. Page 5.

**Figure S7.** Fragment of one of the two interpenetrated frameworks emphasising the positional disorder of the central ring of the ligand 3,8-phen for **1·PhNO<sub>2</sub>**. Page 6.

**Figure S8.** (h0.5l) plane projection with temperature for **1·PhNO<sub>2</sub>**. Page 7.

**Table S1.** Crystal and structure refinement data with temperature and light for **1·PhNO<sub>2</sub>**. Page 7.

**Figure S9.** Rietveld refinement of compound **1**. Page 8.

**Table S2.** Crystal and structure refinement data from Rietveld refinement for **1**. Page 8.

**Table S3/Figure S10.** Selected bond lengths and angles and a representative fragment of the molecular building blocks of compound **1**. The two possible orientations of the ligand 3,8-phen as well as the positional disorder of C4 and C5 have been omitted for clarity. Page 9.

**Figure S11.** Fragment of one of the two interpenetrated frameworks of **1** showing the two possible orientations of the ligand 3,8-phen and positional disorder of C4 and C5 atoms. Page 9.

**Figure S12.** Two orthogonal views of the structure of **1**. The two identical interpenetrated frameworks are coloured in red and blue. Page 10.

**Figure S1.** IR spectrum of **1·PhNO<sub>2</sub>** and **1** in the wave-length window 2000-1200  $\text{cm}^{-1}$  emphasising the evolution of the characteristic asymmetric and symmetric stretching modes when moving from **1·PhNO<sub>2</sub>** to **1** (vertical red lines indicate the position of both modes).

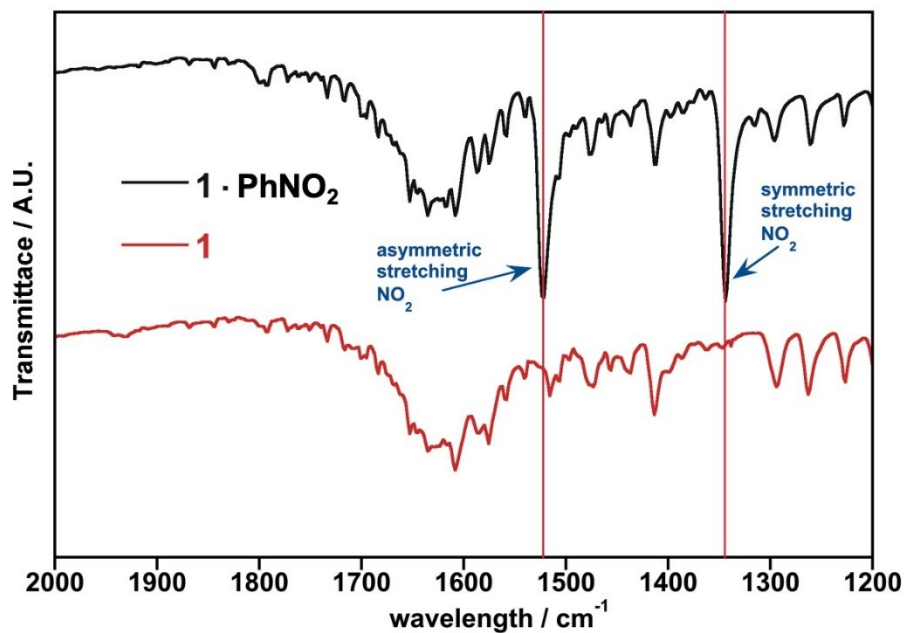

**Figure S2.** Thermogravimetric analysis of **1·PhNO<sub>2</sub>**.

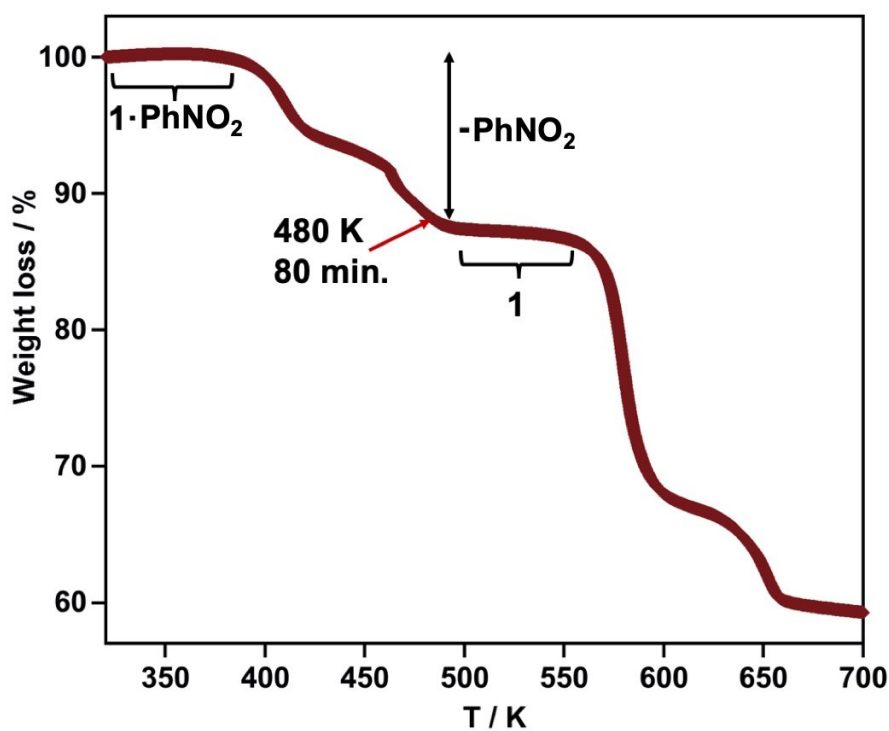

**Figure S3.** Thermal dependence of  $\chi_M T$  for  $1 \cdot \text{PhNO}_2$  before desorption of  $\text{PhNO}_2$  (left) and after re-adsorption of  $\text{PhNO}_2$  (right) from the desorbed compound **1** (middle). Blue and red dots correspond to the cooling and heating modes, respectively.

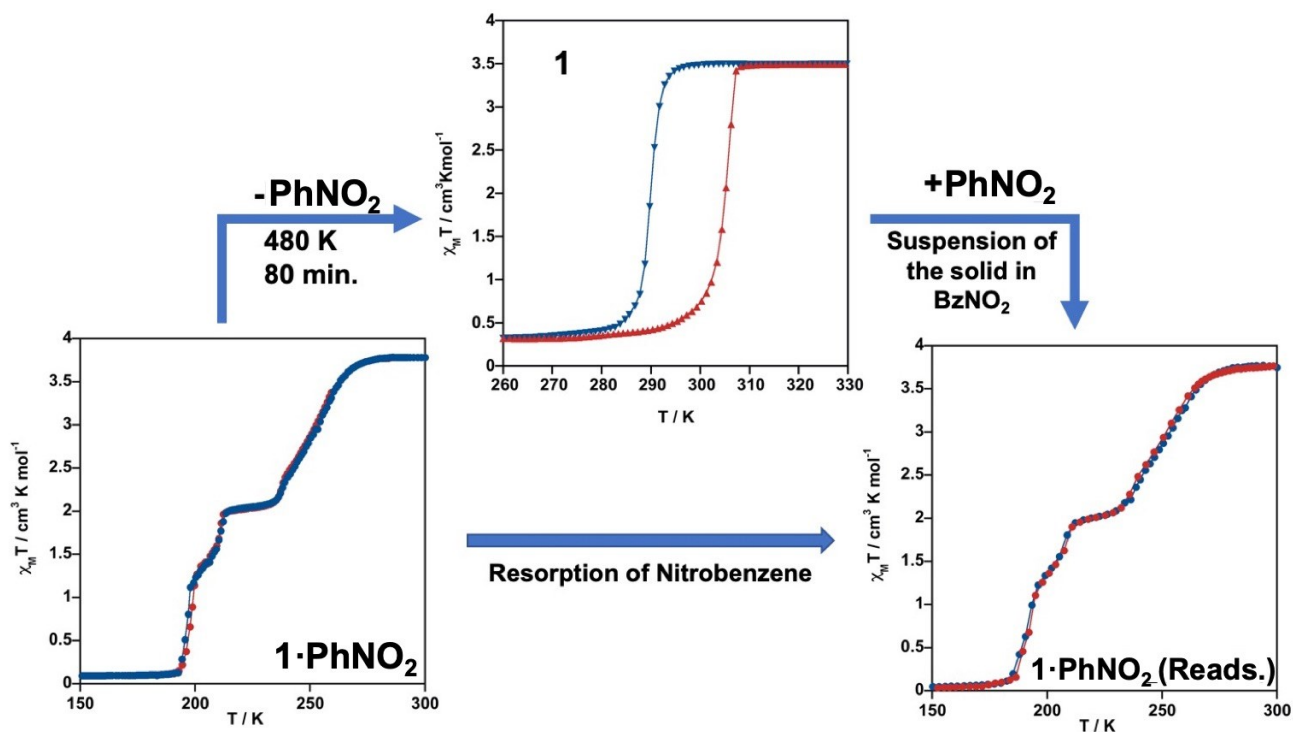

**Figure S4.** Magnetic properties of  $1 \cdot \text{PhNO}_2$  emphasizing the photo-generation of the metastable  $\text{HS}^*$  states at low temperatures (LIESST effect).

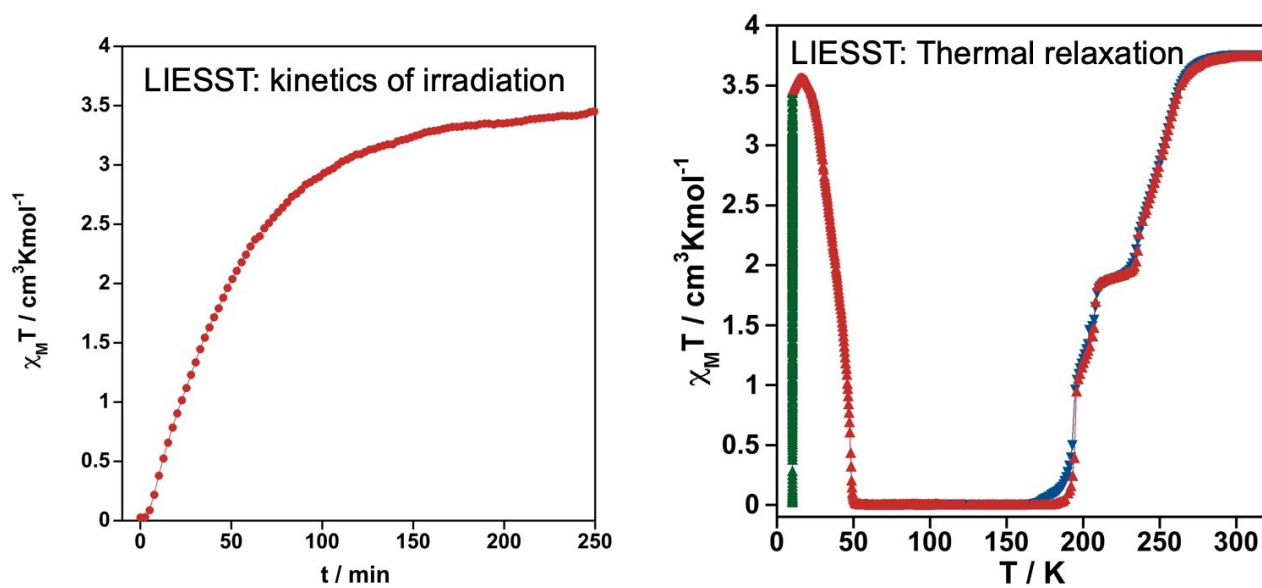

**Figure S5.** (Left) thermal dependence of  $\chi_M T$  (green and blue circles correspond to cooling and heating modes) and  $\Delta H$  (red line). (Right) thermal dependence of  $\Delta H$  (red circles) and its derivative (blue). The numbers inserted correspond to the critical temperatures for each step (the calorimetric measurement have been measured at 5 K/min).

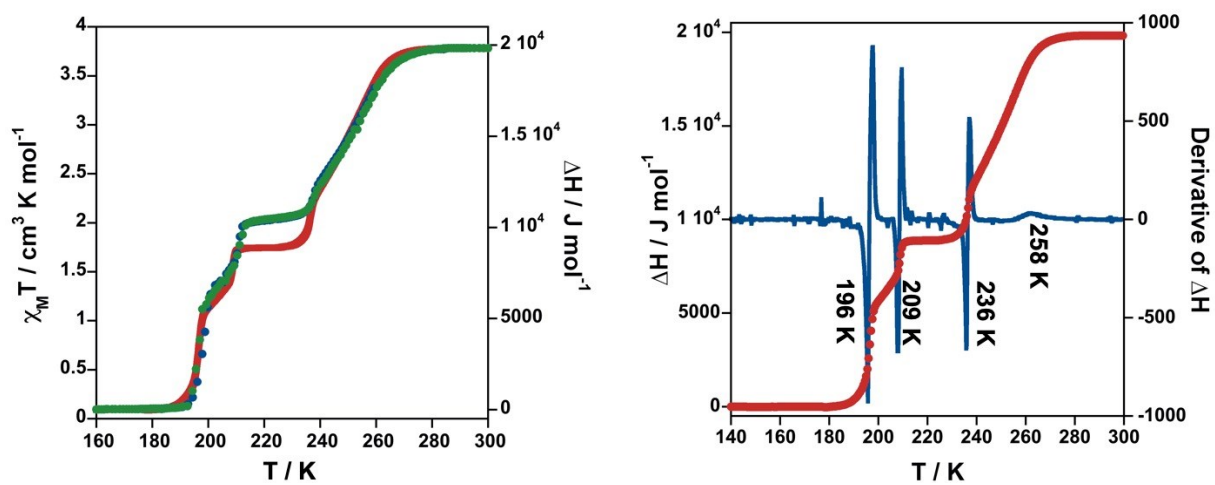

**Figure S6.** Cell parameters change with temperature and light for **1·PhNO<sub>2</sub>**.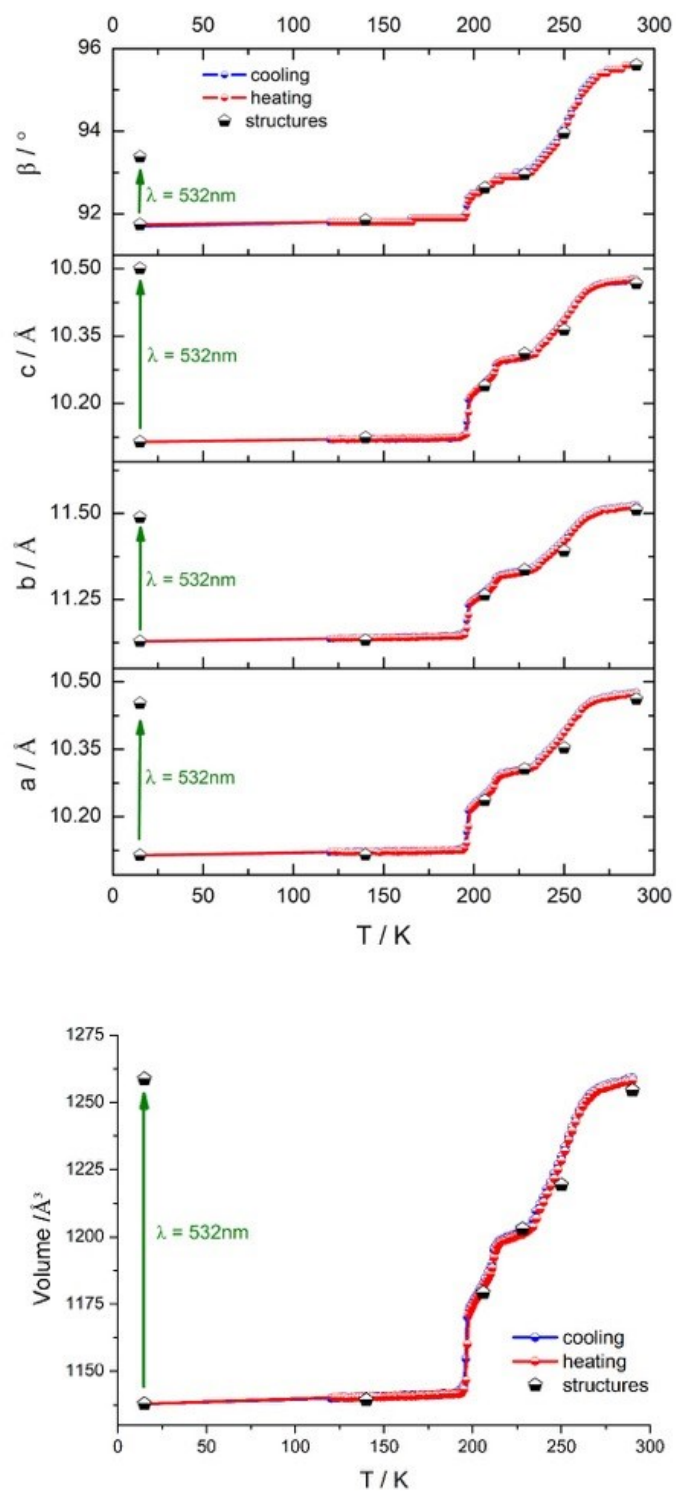

**Figure S7.** Fragment of one of the two interpenetrated frameworks emphasising the positional disorder of the central ring of the ligand 3,8-phen for **1·PhNO<sub>2</sub>**.

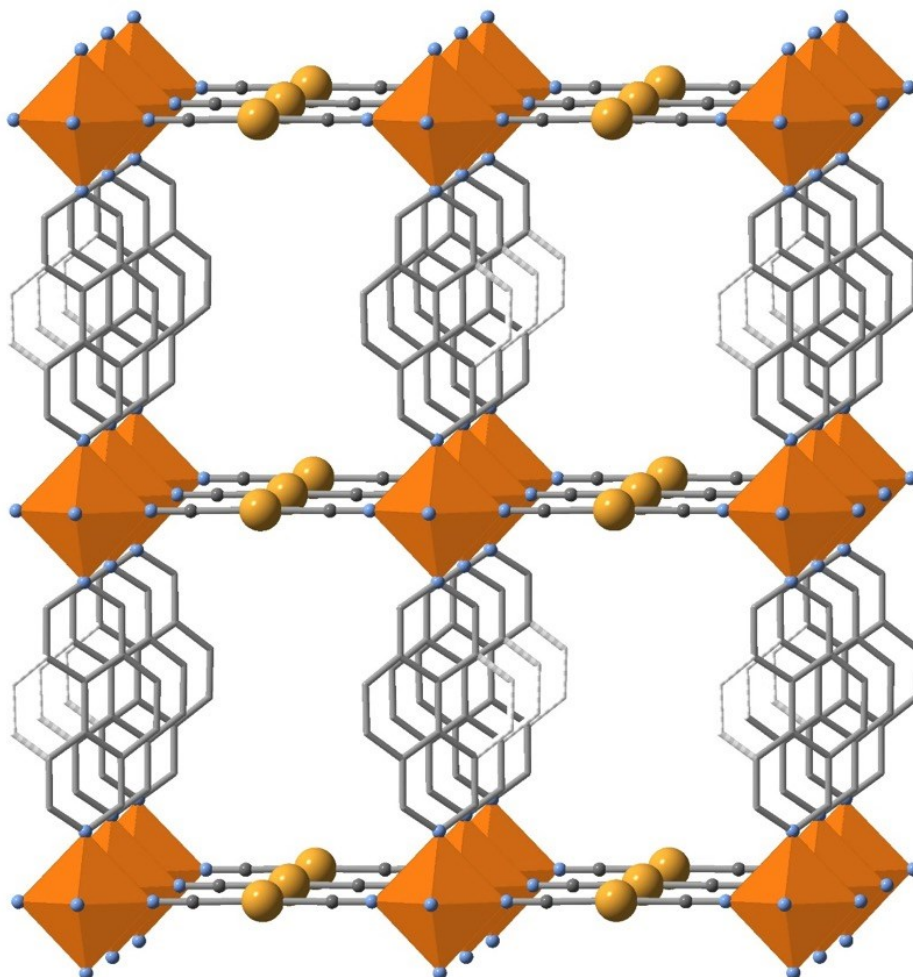

**Figure S8.** (h0.5l) plane projection with temperature for **1·PhNO<sub>2</sub>**.

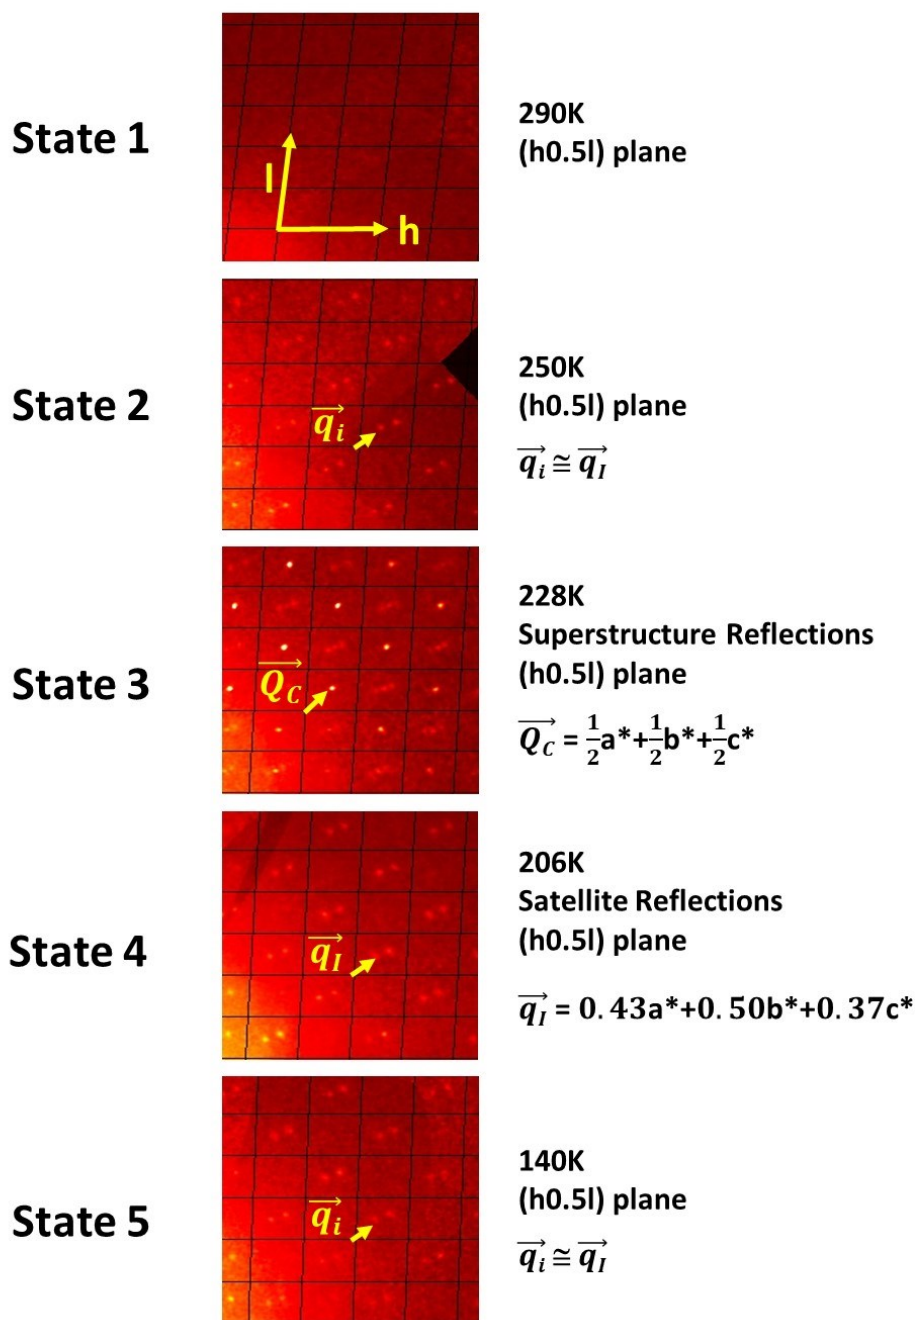

**Table S1.** Crystal and structure refinement data with temperature and light for **1·PhNO<sub>2</sub>**.

|                                                   | <b>State 1</b>                                                                  | <b>State 2</b>                                                                  | <b>State 3</b>                                                                  | <b>State 4</b>                                                                                                                                                                                | <b>State 5</b>                                                                  | <b>State 5</b>                                                                  | <b>State 6/Photo</b>                                                            |
|---------------------------------------------------|---------------------------------------------------------------------------------|---------------------------------------------------------------------------------|---------------------------------------------------------------------------------|-----------------------------------------------------------------------------------------------------------------------------------------------------------------------------------------------|---------------------------------------------------------------------------------|---------------------------------------------------------------------------------|---------------------------------------------------------------------------------|
| <b>Temperature/K</b>                              | 290                                                                             | 250.0                                                                           | 228.0                                                                           | 206.0*                                                                                                                                                                                        | 140.0                                                                           | 15.0                                                                            | 15.0                                                                            |
| <b>Empirical formula</b>                          | C <sub>22</sub> H <sub>13</sub> Au <sub>2</sub> FeN <sub>7</sub> O <sub>2</sub> | C <sub>22</sub> H <sub>13</sub> Au <sub>2</sub> FeN <sub>7</sub> O <sub>2</sub> | C <sub>22</sub> H <sub>13</sub> Au <sub>2</sub> FeN <sub>7</sub> O <sub>2</sub> | C <sub>22</sub> H <sub>13</sub> Au <sub>2</sub> FeN <sub>7</sub> O <sub>2</sub>                                                                                                               | C <sub>22</sub> H <sub>13</sub> Au <sub>2</sub> FeN <sub>7</sub> O <sub>2</sub> | C <sub>22</sub> H <sub>13</sub> Au <sub>2</sub> FeN <sub>7</sub> O <sub>2</sub> | C <sub>22</sub> H <sub>13</sub> Au <sub>2</sub> FeN <sub>7</sub> O <sub>2</sub> |
| <b>Formula weight</b>                             | 857.18                                                                          | 857.18                                                                          | 857.18                                                                          | 857.18                                                                                                                                                                                        | 857.18                                                                          | 857.18                                                                          | 857.18                                                                          |
| <b>Crystal system</b>                             | monoclinic                                                                      | monoclinic                                                                      | monoclinic                                                                      | monoclinic                                                                                                                                                                                    | monoclinic                                                                      | monoclinic                                                                      | monoclinic                                                                      |
| <b>Space group</b>                                | P2/n                                                                            | P2/n                                                                            | I2/a                                                                            | P2/n(a1 2g)0s                                                                                                                                                                                 | P2/n                                                                            | P2/n                                                                            | P2/n                                                                            |
| <b>a/Å</b>                                        | 10.4618(2)                                                                      | 10.3534(3)                                                                      | 14.1982(2)                                                                      | 10.2342(7)                                                                                                                                                                                    | 10.1150(2)                                                                      | 10.1143(3)                                                                      | 10.4523(5)                                                                      |
| <b>b/Å</b>                                        | 11.5106(3)                                                                      | 11.3911(3)                                                                      | 22.6765(3)                                                                      | 11.2690(8)                                                                                                                                                                                    | 11.1318(2)                                                                      | 11.1281(3)                                                                      | 11.4885(4)                                                                      |
| <b>c/Å</b>                                        | 10.4670(2)                                                                      | 10.3639(3)                                                                      | 14.9567(2)                                                                      | 10.2384(7)                                                                                                                                                                                    | 10.1239(2)                                                                      | 10.1146(4)                                                                      | 10.5004(4)                                                                      |
| <b>β/°</b>                                        | 95.605(2)                                                                       | 93.954(3)                                                                       | 90.0258(13)                                                                     | 92.665(5)                                                                                                                                                                                     | 91.852(2)                                                                       | 91.745(3)                                                                       | 93.379(4)                                                                       |
| <b>Volume/Å<sup>3</sup></b>                       | 1254.43(5)                                                                      | 1219.37(6)                                                                      | 4815.54(12)                                                                     | 1179.51(14)                                                                                                                                                                                   | 1139.34(4)                                                                      | 1137.90(6)                                                                      | 1258.71(9)                                                                      |
| <b>Z</b>                                          | 2                                                                               | 2                                                                               | 8                                                                               | 2                                                                                                                                                                                             | 2                                                                               | 2                                                                               | 2                                                                               |
| <b>ρ<sub>calc</sub>/cm<sup>3</sup></b>            | 2.269                                                                           | 2.335                                                                           | 2.365                                                                           | 2.4135                                                                                                                                                                                        | 2.499                                                                           | 2.502                                                                           | 2.262                                                                           |
| <b>μ/mm<sup>-1</sup></b>                          | 12.269                                                                          | 12.622                                                                          | 12.784                                                                          | 13.047                                                                                                                                                                                        | 13.508                                                                          | 13.525                                                                          | 12.227                                                                          |
| <b>F(000)</b>                                     | 788.0                                                                           | 788.0                                                                           | 3152.0                                                                          | 788.0                                                                                                                                                                                         | 788.0                                                                           | 788.0                                                                           | 788.0                                                                           |
| <b>2θ range for data collection/°</b>             | 6.34 to 54.0                                                                    | 6.46 to 54.0                                                                    | 6.11 to 54.0                                                                    | 6.02 to 66.4                                                                                                                                                                                  | 6.69 to 54.0                                                                    | 5.78 to 54.0                                                                    | 6.69 to 54.0                                                                    |
| <b>Reflections collected</b>                      | 22283                                                                           | 10723                                                                           | 39378                                                                           | 40157                                                                                                                                                                                         | 9626                                                                            | 5915                                                                            | 8184                                                                            |
| <b>Independent reflections</b>                    | 2749<br>[R <sub>int</sub> = 0.0401, R <sub>sigma</sub> = 0.0219]                | 2675<br>[R <sub>int</sub> = 0.0284, R <sub>sigma</sub> = 0.0252]                | 5259<br>[R <sub>int</sub> = 0.0454, R <sub>sigma</sub> = 0.0270]                | 12688(3704+8984)<br>[R <sub>int</sub> = 0.0459, R <sub>sigma</sub> = 0.0676]                                                                                                                  | 2494<br>[R <sub>int</sub> = 0.0293, R <sub>sigma</sub> = 0.0266]                | 2490<br>[R <sub>int</sub> = 0.0361, R <sub>sigma</sub> = 0.0547]                | 2758<br>[R <sub>int</sub> = 0.0442, R <sub>sigma</sub> = 0.0565]                |
| <b>Refinement method</b>                          | F <sup>2</sup>                                                                  | F <sup>2</sup>                                                                  | F <sup>2</sup>                                                                  | F                                                                                                                                                                                             | F <sup>2</sup>                                                                  | F <sup>2</sup>                                                                  | F <sup>2</sup>                                                                  |
| <b>Data/restraints/parameters</b>                 | 2749/45/181                                                                     | 2675/45/180                                                                     | 5259/117/407                                                                    | 12688 / 19 / 394                                                                                                                                                                              | 2494/43/180                                                                     | 2490/92/180                                                                     | 2758/79/180                                                                     |
| <b>Goodness-of-fit</b>                            | 1.026                                                                           | 1.061                                                                           | 1.033                                                                           | 1.55 <sub>(obs)</sub> /1.18 <sub>(all)</sub>                                                                                                                                                  | 1.072                                                                           | 1.057                                                                           | 1.074                                                                           |
| <b>Final R indexes [I&gt;=2σ (I)]</b>             | R <sub>1</sub> = 0.0247,<br>wR <sub>2</sub> = 0.0543                            | R <sub>1</sub> = 0.0287,<br>wR <sub>2</sub> = 0.0642                            | R <sub>1</sub> = 0.0300,<br>wR <sub>2</sub> = 0.0691                            | R <sub>1(all)</sub> = 0.0416, wR <sub>2(all)</sub> = 0.0487;<br>R <sub>1(main)</sub> = 0.0335, wR <sub>2(main)</sub> = 0.0412;<br>R <sub>1(sat)</sub> = 0.1093, wR <sub>2(sat)</sub> = 0.1380 | R <sub>1</sub> = 0.0272,<br>wR <sub>2</sub> = 0.0625                            | R <sub>1</sub> = 0.0370,<br>wR <sub>2</sub> = 0.0808                            | R <sub>1</sub> = 0.0359,<br>wR <sub>2</sub> = 0.0687                            |
| <b>Final R indexes [all data]</b>                 | R <sub>1</sub> = 0.0324,<br>wR <sub>2</sub> = 0.0571                            | R <sub>1</sub> = 0.0441,<br>wR <sub>2</sub> = 0.0707                            | R <sub>1</sub> = 0.0480,<br>wR <sub>2</sub> = 0.0779                            | R <sub>1(all)</sub> = 0.1618, wR <sub>2(all)</sub> = 0.0706;<br>R <sub>1(main)</sub> = 0.0635, wR <sub>2(main)</sub> = 0.0467;<br>R <sub>1(sat)</sub> = 0.4403, wR <sub>2(sat)</sub> = 0.2400 | R <sub>1</sub> = 0.0349,<br>wR <sub>2</sub> = 0.0660                            | R <sub>1</sub> = 0.0587,<br>wR <sub>2</sub> = 0.0913                            | R <sub>1</sub> = 0.0548,<br>wR <sub>2</sub> = 0.0775                            |
| <b>Largest diff. peak/hole / e Å<sup>-3</sup></b> | 0.56/-0.45                                                                      | 1.00/-0.82                                                                      | 1.21/-0.81                                                                      | 0.45/-0.58                                                                                                                                                                                    | 2.10/-1.35                                                                      | 2.35/-1.03                                                                      | 1.37/-1.11                                                                      |



Figure S9. Rietveld refinement of compound 1.

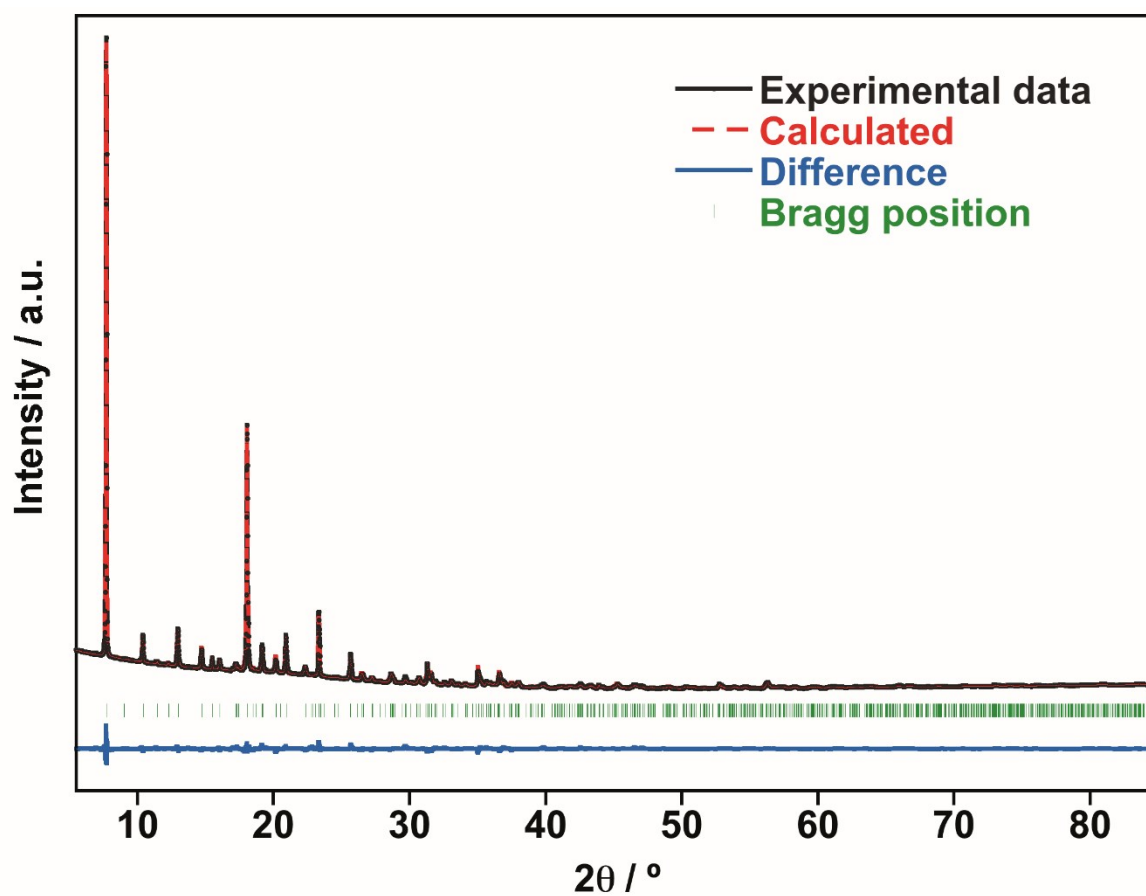

Table S2. Selected crystallographic data from Powder X-ray diffraction of compound 1.

|                                    |                                                                  |
|------------------------------------|------------------------------------------------------------------|
| Temperature/K                      | 290                                                              |
| Empirical formula                  | C <sub>16</sub> H <sub>8</sub> Au <sub>2</sub> Fe N <sub>6</sub> |
| Formula weight                     | 734.07                                                           |
| Crystal system                     | Monoclinic                                                       |
| Space group                        | <i>C2/m</i>                                                      |
| a/Å                                | 12.0682(4)                                                       |
| b/Å                                | 16.9687(4)                                                       |
| c/Å                                | 11.4632(3)                                                       |
| β/°                                | 94.888(4)                                                        |
| Volume/Å <sup>3</sup>              | 2338.91(11)                                                      |
| Z                                  | 4                                                                |
| ρ <sub>calc</sub> /cm <sup>3</sup> | 2.08470                                                          |
| Wavelength/ Å                      | 1.540596                                                         |
| pd proc ls prof R factor           | 2.12                                                             |
| pd proc ls prof wR factor          | 3.06                                                             |
| pd proc ls prof wR expected        | 1.48                                                             |
| Refine ls goodness of fit all      | 2.06                                                             |
| Refine ls R factor all             | 1.72                                                             |

**Table S3 (left)/Figure S10 (right).** Selected bond lengths and angles and a representative fragment of the molecular building blocks of compound **1**. The two possible orientations of the ligand 3,8-phen as well as the positional disorder of C4 and C5 have been omitted for clarity.

|                     |           |
|---------------------|-----------|
| <b>Au1-C15</b>      | 1.999(12) |
| <b>Au1-C16</b>      | 1.999(12) |
| <b>Fe12-N2</b>      | 2.252(2)  |
| <b>Fe12-N3</b>      | 2.246(2)  |
| <b>Fe12-N8</b>      | 2.11(2)   |
| <b>Fe12-N10</b>     | 2.11(2)   |
| <b>N2-C8</b>        | 1.333(8)  |
| <b>N2-C9</b>        | 1.346(7)  |
| <b>N3-C7</b>        | 1.334(7)  |
| <b>N3-C14</b>       | 1.243(7)  |
| <b>N8-C15</b>       | 1.13(2)   |
| <b>N10-C16</b>      | 1.13(2)   |
| <b>C15-Au1-C16</b>  | 180.0(6)  |
| <b>N3-Fe12-N10</b>  | 93.39(11) |
| <b>N3-Fe12-N8</b>   | 86.60(11) |
| <b>N2-Fe12-N10</b>  | 86.61(11) |
| <b>N2-Fe12-N8</b>   | 93.40(11) |
| <b>N10-Fe12-N10</b> | 94.9(8)   |
| <b>Fe12-N8-C15</b>  | 168.0(19) |
| <b>Fe12-N10-C16</b> | 168.0(19) |

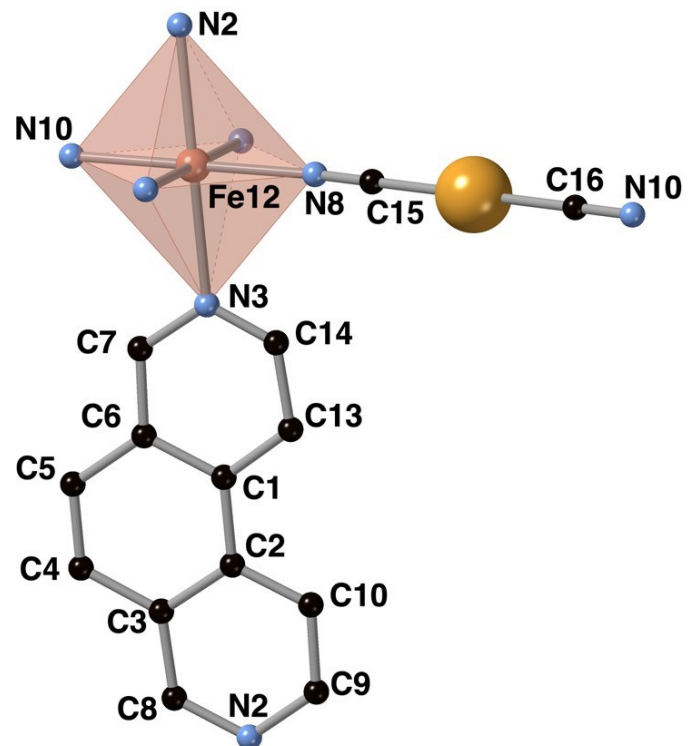

**Figure S11.** Fragment of one of the two interpenetrated frameworks of **1** showing the two possible orientations of the ligand 3,8-phen and positional disorder of C4 and C5 atoms.

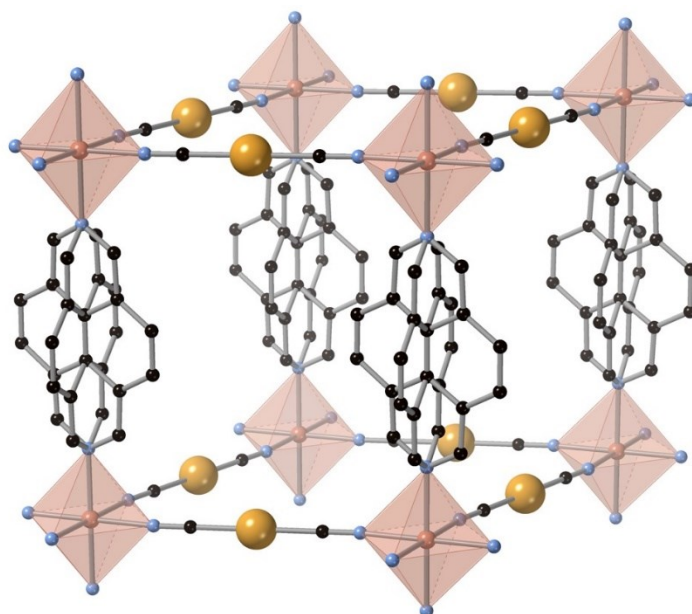

**Figure S12.** Two orthogonal views of the structure of **1**. The two identical interpenetrated frameworks are coloured in red and blue.

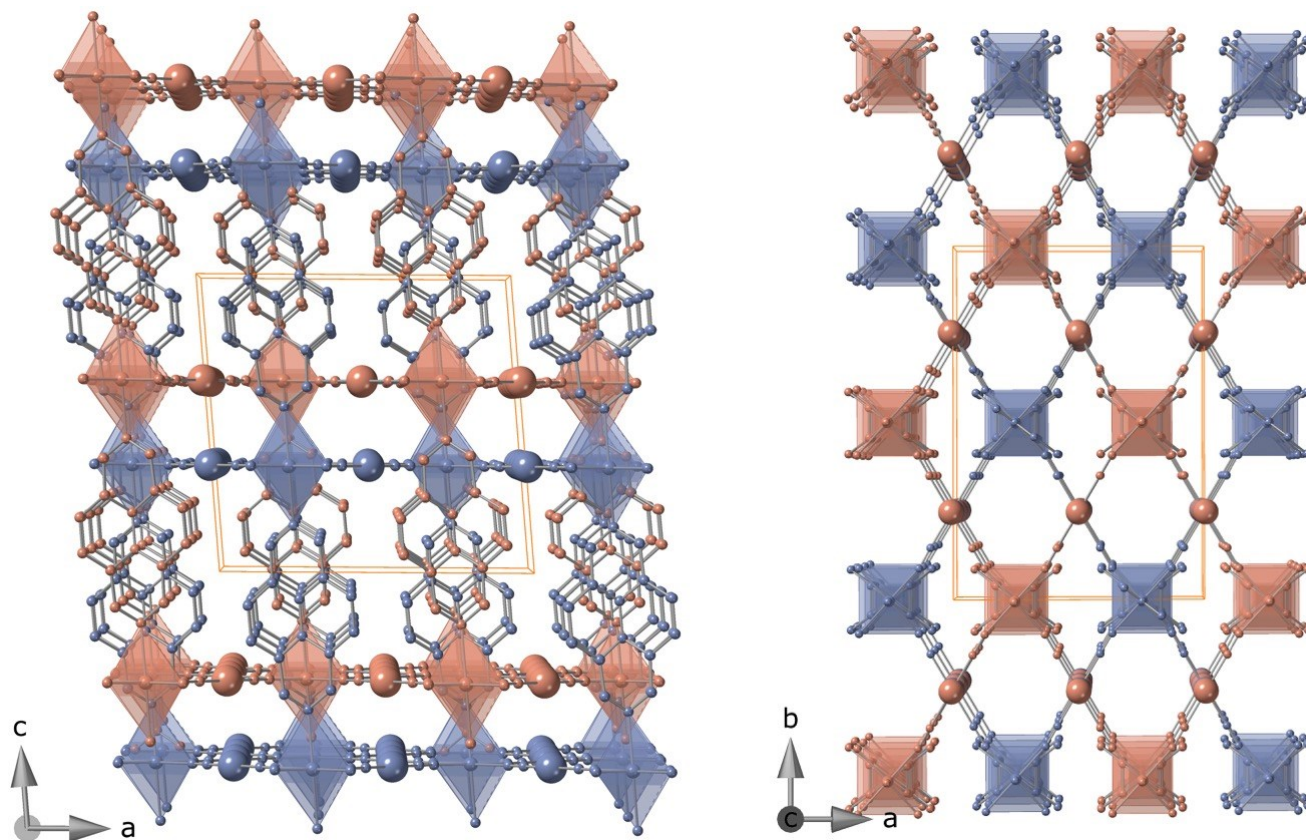

Supplement: SC-012-D0SC04420B-s001.pdf [file SC-012-D0SC04420B-s001.pdf]
